# Supplementary material for: The system Ce–Zn–Si for <33.3 at.% Ce: phase relations, crystal structures and physical properties
Source: Royal Society of Chemistry journal article supplement (doi:10.1039/c5ra02789f), 2015-01-01
Supplement: c5ra02789f1.pdf [file c5ra02789f1.pdf]

# The System Ce-Zn-Si for <33.3% at. Ce: Phase Relations, Crystal Structures and Physical Properties

Fainan Failamani<sup>a</sup>, Andriy Grytsiv<sup>a,f</sup>, Raimund Podloucky<sup>a</sup>, Herwig Michor<sup>b</sup>, Ernst Bauer<sup>b,f</sup>, Pavel Broz<sup>c,d</sup>, Gerald Giester<sup>e</sup>, Peter Rogl<sup>a,f</sup> \*

<sup>a</sup> Institute of Physical Chemistry, University of Vienna, Währingerstraße 42, A-1090 Vienna, Austria. Email: fai.failamani@gmail.com, andriy.grytsiv@univie.ac.at, raimund.podloucky@univie.ac.at, peter.franz.rogl@univie.ac.at; Fax: +43 142779524; Tel: +43 1427752456

<sup>b</sup> Institute of Solid State Physics, Vienna University of Technology, Wiedner Hauptstraße 8-10, A-1040 Vienna, Austria. Email: michor@ifp.tuwien.ac.at, bauer@ifp.tuwien.ac.at; Fax: +43 15880113199; Tel: +4315880113160

<sup>c</sup> Masaryk University, Faculty of Science, Department of Chemistry, Kotlarska 2, Brno 61137, Czech Republic.

<sup>d</sup> Masaryk University, Central European Institute of Technology, CEITEC, Kamenice 753/5, Brno 62500, Czech Republic. Email: broz@chemi.muni.cz; Fax: +420 549493299; Tel: +420 549493299

<sup>e</sup> Institute of Mineralogy and Crystallography, University of Vienna, Althanstraße 14, A-1090 Vienna, Austria. Email: gerald.giester@univie.ac.at; Fax: +43 14277853235; Tel: +43 1427753235;

<sup>f</sup> Christian Doppler Laboratory for Thermoelectricity, Vienna University of Technology, Wiedner Hauptstraße 8-10, A-1040 Vienna, Austria.

**Table S1.** Crystallographic data of unary and binary boundary solid phases of the system Ce-Zn-Si.

| Phase<br>Temperature range (°C)                                                                                  | Space group,<br>Prototype                       | Lattice parameters (nm)                |                                     |                                        | Comments                                                                                                                            |
|------------------------------------------------------------------------------------------------------------------|-------------------------------------------------|----------------------------------------|-------------------------------------|----------------------------------------|-------------------------------------------------------------------------------------------------------------------------------------|
|                                                                                                                  |                                                 | a                                      | b                                   | c                                      |                                                                                                                                     |
| ( $\delta$ Ce)<br>798-700 <sup>1</sup>                                                                           | $Im\bar{3}m$<br>W                               | 0.412                                  | -                                   | -                                      | 1<br>-                                                                                                                              |
| ( $\gamma$ Ce)<br><726 <sup>1</sup>                                                                              | $Fm\bar{3}m$<br>Cu                              | 0.51610                                | -                                   | -                                      | 1                                                                                                                                   |
| (Zn)<br><420 <sup>1</sup>                                                                                        | $P6_3/mmc$                                      | 0.2665                                 | -                                   | 0.4947                                 | 1<br>-                                                                                                                              |
| (Si)<br><1414 <sup>1</sup>                                                                                       | $Fd\bar{3}m$<br>C ( <i>Diamond</i> )            | 0.543110                               | -                                   | -                                      | 2                                                                                                                                   |
| CeSi <sub>2</sub><br><1725 <sup>3</sup>                                                                          | $Imma$<br>$\alpha$ GdSi <sub>2</sub>            | 0.4189(1)                              | -                                   | 0.4109(1)                              | Ce <sub>37.4</sub> Si <sub>62.6</sub> <sup>3</sup>                                                                                  |
| CeSi <sub>2</sub><br>~1575 <sup>3</sup><br>Ce(Zn <sub>x</sub> Si <sub>1-x</sub> ) <sub>2</sub>                   | $I4_1/amd$ O2<br>$\alpha$ ThSi <sub>2</sub>     | 0.4192(1)<br>0.4201(1)<br>0.42029(6)   | -                                   | 1.3913(5)<br>1.4312(7)<br>1.4258(4)    | Ce <sub>33.3</sub> Si <sub>66.7</sub> <sup>3</sup><br>$x_{max}=0.32$ at 800°C <sup>4</sup><br>$x_{max}=0.30$ , at 600°C [this work] |
| CeSi<br><1630 <sup>3</sup>                                                                                       | $Pnma$<br>FeB                                   | 0.8298(4)                              | -                                   | 0.3961(2)                              | Ce <sub>49.9</sub> Si <sub>50.1</sub> <sup>3</sup>                                                                                  |
| Ce <sub>5</sub> Si <sub>4</sub><br><1500 <sup>3</sup>                                                            | $P4_12_12$<br>Zr <sub>5</sub> Si <sub>4</sub>   | 0.7936(1)                              | -                                   | 1.5029(5)                              | Ce <sub>55.6</sub> Si <sub>44.4</sub> <sup>3</sup>                                                                                  |
| Ce <sub>3</sub> Si <sub>2</sub><br><1335 <sup>3</sup>                                                            | $P4/mbm$<br>U <sub>3</sub> Si <sub>2</sub>      | 0.7780(6)                              | -                                   | 0.4367(6)                              | 3                                                                                                                                   |
| Ce <sub>3</sub> Si <sub>3</sub><br><1260 <sup>3</sup>                                                            | $I4/mcm$<br>Cr <sub>5</sub> B <sub>3</sub>      | 0.7878(4)                              | -                                   | 1.067(1)                               | 3                                                                                                                                   |
| Ce <sub>2</sub> Si <sub>3-x</sub>                                                                                | $Cmcm$<br>V <sub>2</sub> B <sub>3</sub>         | 0.44035                                | 2.48389                             | 0.39517                                | $x=0.3$ <sup>5</sup>                                                                                                                |
| CeSi <sub>5</sub><br><827                                                                                        | $Immm$<br>LaGe <sub>5</sub>                     | 0.37774839                             | 0.60189(4)                          | 0.92979(6)                             | 6<br>high pressure phase; 10GPa                                                                                                     |
| Ce <sub>2</sub> Si <sub>7</sub><br><1127                                                                         | $Cmmm$<br>Ce <sub>2</sub> Si <sub>7</sub>       | 0.70893(7)                             | 0.99644(7)                          | 0.44868(4)                             | 6<br>high pressure phase; 10GPa                                                                                                     |
| CeZn<br><825 <sup>1</sup>                                                                                        | $Pm\bar{3}m$<br>CsCl                            | 0.3704(1)<br>0.37059(2)                | -<br>-                              | -<br>-                                 | 7<br>8                                                                                                                              |
| CeZn <sub>2</sub><br><875 <sup>1</sup><br>Ce(Zn <sub>1-x</sub> Si <sub>x</sub> ) <sub>2</sub>                    | $Imma$<br>CeCu <sub>2</sub>                     | 0.46393(8)<br>0.4583(3)<br>0.46417(6)  | 0.7544(1)<br>0.7568(5)<br>0.7596(7) | 0.7506(1)<br>0.759(5)<br>0.7508(1)     | 8<br>$x_{max}=0.18$ <sup>4</sup><br>$x=0.05$ at 600°C [this work]                                                                   |
| CeZn <sub>3</sub><br><820 <sup>1</sup>                                                                           | $Cmcm$<br>CeZn <sub>3</sub>                     | 0.4620(5)<br>0.46324(5)                | 1.0440(5)<br>1.0452(1)              | 0.6640(5)<br>0.66557(6)                | 7<br>8                                                                                                                              |
| Ce <sub>3</sub> Zn <sub>11</sub><br><840 <sup>1</sup>                                                            | $Immm$<br>La <sub>3</sub> Al <sub>11</sub>      | 0.45215<br>0.45242(2)                  | 0.88855<br>0.88942(3)               | 1.3463<br>1.34754(4)                   | 7<br>SC <sup>8</sup>                                                                                                                |
| Ce <sub>13</sub> Zn <sub>58</sub><br><870 <sup>1</sup>                                                           | $P6_3/mmc$<br>Gd <sub>13</sub> Zn <sub>58</sub> | 1.4638(1)<br>1.4616(1)                 | -<br>-                              | 1.4158(1)<br>1.4173(1)                 | 9<br>8                                                                                                                              |
| CeZn <sub>5</sub><br><885 <sup>1</sup><br>CeZn <sub>5+y</sub>                                                    | $P6/mmm$<br>CaCu <sub>5</sub>                   | 0.54163(5)<br>0.54082(1)<br>0.54163(5) | -<br>-<br>-                         | 0.42647(5)<br>0.42798(1)<br>0.42647(5) | 7<br>8<br>0.017 $\leq y \leq$ 0.046 <885°C <sup>10</sup>                                                                            |
| Ce <sub>3</sub> Zn <sub>22</sub><br><960 <sup>1</sup>                                                            | $I4_1/amd$<br>Ce <sub>3</sub> Zn <sub>22</sub>  | 0.897(1)<br>0.8936(2)                  | -<br>-                              | 2.133(5)<br>2.1380(5)                  | 11<br>SC <sup>8</sup>                                                                                                               |
| $\beta$ Ce <sub>2</sub> Zn <sub>17</sub><br><980 <sup>1</sup><br>980--750 <sup>8</sup>                           | $R\bar{3}m$<br>Th <sub>2</sub> Zn <sub>17</sub> | 0.9090(5)<br>0.90916(4)                | -<br>-                              | 1.32844(7)<br>1.32861(1)               | 7<br>8                                                                                                                              |
| $\alpha$ Ce <sub>2</sub> Zn <sub>17</sub><br>$\alpha$ Ce <sub>1+x</sub> Zn <sub>5+2x</sub><br><~750 <sup>8</sup> | $P6_3/mmc$<br>TbCu <sub>7</sub>                 | 0.9088(4)<br>0.52424(2)                | -<br>-                              | 0.8856(5)<br>0.44274(1)                | 12<br>$x=0.33$ <sup>8</sup>                                                                                                         |
| CeZn <sub>11</sub><br><795 <sup>1</sup>                                                                          | $I4_1/amd$<br>BaCd <sub>11</sub>                | 1.0658(6)<br>1.06630(1)                | -                                   | 0.6862(8)<br>0.686644(7)               | 13<br>8                                                                                                                             |

**Table S2.** Interatomic distances (<0.421 nm) in  $\tau_5$ -CeZn(Zn<sub>1-x</sub>Si<sub>x</sub>)<sub>2</sub>, x = 0.71 and  $\tau_6$ -CeZn<sub>2</sub>(Si<sub>1-x</sub>Zn<sub>x</sub>)<sub>2</sub>, x = 0.30).

| $\tau_5$ -CeZn(Zn <sub>1-x</sub> Si <sub>x</sub> ) <sub>2</sub> , x = 0.71 |                      |           |              |          |          | $\tau_6$ -CeZn <sub>2</sub> (Si <sub>1-x</sub> Zn <sub>x</sub> ) <sub>2</sub> , x = 0.30 |                     |           |
|----------------------------------------------------------------------------|----------------------|-----------|--------------|----------|----------|------------------------------------------------------------------------------------------|---------------------|-----------|
| Atom 1                                                                     | Atom 2               | Distance  | Atom 1       | Atom 2   | Distance | Atom 1                                                                                   | Atom 2              | Distance  |
| Ce<br>CN=21                                                                | M1 (2x)              | 0.31726   |              | Ce (2x)  | 0.31726  | Ce<br>CN=22                                                                              | M (8x)              | 0.31901   |
|                                                                            | M1 (4x)              | 0.31916   |              | Ce (4x)  | 0.31916  |                                                                                          | Zn1 (8x)            | 0.33555   |
|                                                                            | M2 (4x)              | 0.31940   | M2<br>CN=9   | M1 (1x)  | 0.23975  |                                                                                          | M (2x) <sup>a</sup> | (0.40460) |
|                                                                            | Zn3 (2x)             | 0.33470   |              | Zn3 (2x) | 0.25263  | Ce (4x) <sup>a</sup>                                                                     | (0.41757)           |           |
|                                                                            | Zn3 (2x)             | 0.33714   |              | Zn3 (2x) | 0.25381  | Zn1                                                                                      | M (4x)              | 0.25245   |
|                                                                            | M2 (1x) <sup>a</sup> | (0.40539) | Zn3<br>CN=16 | Ce (4x)  | 0.31940  | CN=12                                                                                    | Zn1 (4x)            | 0.29527   |
|                                                                            | Ce (2x) <sup>a</sup> | (0.41324) |              | M2 (2x)  | 0.25263  |                                                                                          | Ce (4x)             | 0.33555   |
|                                                                            | Ce (2x) <sup>a</sup> | (0.41619) |              | M2 (2x)  | 0.25381  | M<br>CN=9                                                                                | M (1x)              | 0.24152   |
| Ce (2x) <sup>a</sup>                                                       | (0.42079)            | Zn3 (4x)  |              | 0.29592  | Zn1 (4x) |                                                                                          | 0.25245             |           |
| M1                                                                         | M1 (2x)              | 0.23917   |              | Ce (2x)  | 0.33470  |                                                                                          | Ce (4x)             | 0.31901   |
| CN=9                                                                       | M2 (1x)              | 0.23975   | Ce (2x)      | 0.33714  |          |                                                                                          |                     |           |

Contribution of these atoms to the Dirichlet domain is less than 2%, which indicates rather weak bonding.

## References

- 1 *Pauling File Binary Edition, Version 1.0, Release 2002/1*, ASM international, Materials Park, OH, USA, 2002.
- 2 G. Celotti, D. Nobili and P. Ostoja, *J. Mater. Sci.*, 1974, **9**, 821–828.
- 3 M. V. Bulanova, P. N. Zheltov, K. A. Meleshevich, P. A. Saltykov and G. Effenberg, *J. Alloys Compd.*, 2002, **345**, 110–115.
- 4 Z. Malik, A. Grytsiv, P. Rogl and G. Giester, *Intermetallics*, 2013, **36**, 118–126.
- 5 P. Schobinger-Papamantellos and K. H. J. Buschow, *J. Alloys Compd.*, 1993, **198**, 47–50.
- 6 A. Wosylus, K. Meier, Y. Prots, W. Schnelle, H. Rosner, U. Schwarz and Y. Grin, *Angew. Chem.*, 2010, **122**, 9187–9191.
- 7 P. Villars and K. Cenzual, *Pearson's Crystal Data—Crystal Structure Database for Inorganic Compounds, release 2014/15*, ASM International, Materials Park, OH, USA, 2014.
- 8 Z. Malik, O. Sologub, G. Giester and P. Rogl, *J. Solid State Chem.*, 2011, **184**, 2840–2848.
- 9 S. Piao, C. P. Gómez and S. Lidin, *Z. Krist.*, 2006, **221**, 391–401.
- 10 B. G. Lott and P. Chiotti, *Acta Crystallogr.*, 1966, **20**, 733–738.
- 11 P. I. Kripyakevich, Y. B. Kuz'ma and N. S. Ugrin, *J. Struct. Chem.*, 1968, **8**, 632–633.
- 12 A. Iandelli and A. Palenzona, *J. -Common Met.*, 1967, **12**, 333–343.
- 13 O. Zelinska, M. Conrad and B. Harbrecht, *Z. Krist. - New Cryst. Struct.*, 2004, **219**, 357–358.
